# Supplementary material for: From Disease Association to Risk Assessment: An Optimistic View from Genome-Wide Association Studies on Type 1 Diabetes
Source: PubMed Central journal article supplement (PMC2748686; doi:10.1371/journal.pgen.1000678), 2009-10-09
Supplement: pgen.1000678.s002.pdf [file pgen.1000678.s002.pdf]

| <b>Algorithm</b> | <b>P Cutoff</b>    | <b>1x10<sup>-8</sup></b> | <b>1x10<sup>-7</sup></b> | <b>1x10<sup>-6</sup></b> | <b>1x10<sup>-5</sup></b> | <b>1x10<sup>-4</sup></b> | <b>1x10<sup>-3</sup></b> |
|------------------|--------------------|--------------------------|--------------------------|--------------------------|--------------------------|--------------------------|--------------------------|
|                  | <b>#SNPs</b>       | 312                      | 365                      | 417                      | 478                      | 632                      | 1145                     |
| <b>SVM</b>       | <b>AUC</b>         | 0.835                    | 0.84                     | 0.841                    | 0.833                    | 0.828                    | 0.812                    |
|                  | <b>Sensitivity</b> | 0.776                    | 0.77                     | 0.761                    | 0.772                    | 0.767                    | 0.765                    |
|                  | <b>specificity</b> | 0.758                    | 0.762                    | 0.758                    | 0.74                     | 0.75                     | 0.702                    |
| <b>LR</b>        | <b>AUC</b>         | 0.58                     | 0.605                    | 0.613                    | 0.622                    | 0.617                    | 0.693                    |
|                  | <b>Sensitivity</b> | 0.517                    | 0.536                    | 0.549                    | 0.546                    | 0.551                    | 0.599                    |
|                  | <b>specificity</b> | 0.588                    | 0.604                    | 0.601                    | 0.62                     | 0.588                    | 0.686                    |
