# Supplementary material for: From Disease Association to Risk Assessment: An Optimistic View from Genome-Wide Association Studies on Type 1 Diabetes
Source: PubMed Central journal article supplement (PMC2748686; doi:10.1371/journal.pgen.1000678), 2009-10-09
Supplement: pgen.1000678.s003.pdf [file pgen.1000678.s003.pdf]

| <b>Algorithm</b> | <b>P Cutoff</b>    | <b>1x10<sup>-8</sup></b> | <b>1x10<sup>-7</sup></b> | <b>1x10<sup>-6</sup></b> | <b>1x10<sup>-5</sup></b> | <b>1x10<sup>-4</sup></b> | <b>1x10<sup>-3</sup></b> |
|------------------|--------------------|--------------------------|--------------------------|--------------------------|--------------------------|--------------------------|--------------------------|
|                  | <b>#SNPs</b>       | 267                      | 313                      | 358                      | 409                      | 539                      | 1004                     |
| <b>SVM</b>       | <b>AUC</b>         | 0.832                    | 0.838                    | 0.837                    | 0.839                    | 0.834                    | 0.814                    |
|                  | <b>Sensitivity</b> | 0.779                    | 0.792                    | 0.793                    | 0.791                    | 0.788                    | 0.795                    |
|                  | <b>specificity</b> | 0.716                    | 0.719                    | 0.716                    | 0.717                    | 0.708                    | 0.669                    |
| <b>LR</b>        | <b>AUC</b>         | 0.781                    | 0.803                    | 0.805                    | 0.805                    | 0.786                    | 0.753                    |
|                  | <b>Sensitivity</b> | 0.708                    | 0.734                    | 0.732                    | 0.723                    | 0.716                    | 0.707                    |
|                  | <b>specificity</b> | 0.679                    | 0.695                    | 0.706                    | 0.709                    | 0.713                    | 0.663                    |
