# Supplementary material for: From Disease Association to Risk Assessment: An Optimistic View from Genome-Wide Association Studies on Type 1 Diabetes
Source: PubMed Central journal article supplement (PMC2748686; doi:10.1371/journal.pgen.1000678), 2009-10-09
Supplement: pgen.1000678.s004.pdf [file pgen.1000678.s004.pdf]

| <b>Algorithm</b> | <b>P Cutoff</b>    | <b>1x10<sup>-8</sup></b> | <b>1x10<sup>-7</sup></b> | <b>1x10<sup>-6</sup></b> | <b>1x10<sup>-5</sup></b> | <b>1x10<sup>-4</sup></b> | <b>1x10<sup>-3</sup></b> |
|------------------|--------------------|--------------------------|--------------------------|--------------------------|--------------------------|--------------------------|--------------------------|
|                  | <b>#SNPs</b>       | 192                      | 235                      | 280                      | 340                      | 445                      | 1098                     |
| <b>SVM</b>       | <b>AUC</b>         | 0.839                    | 0.844                    | 0.845                    | 0.843                    | 0.834                    | 0.771                    |
|                  | <b>Sensitivity</b> | 0.876                    | 0.876                    | 0.864                    | 0.855                    | 0.833                    | 0.724                    |
|                  | <b>specificity</b> | 0.632                    | 0.646                    | 0.653                    | 0.666                    | 0.667                    | 0.676                    |
| <b>LR</b>        | <b>AUC</b>         | 0.614                    | 0.582                    | 0.607                    | 0.573                    | 0.578                    | 0.655                    |
|                  | <b>Sensitivity</b> | 0.616                    | 0.591                    | 0.611                    | 0.552                    | 0.554                    | 0.581                    |
|                  | <b>specificity</b> | 0.535                    | 0.507                    | 0.536                    | 0.532                    | 0.551                    | 0.629                    |
