# Supplementary material for: From Disease Association to Risk Assessment: An Optimistic View from Genome-Wide Association Studies on Type 1 Diabetes
Source: PubMed Central journal article supplement (PMC2748686; doi:10.1371/journal.pgen.1000678), 2009-10-09
Supplement: pgen.1000678.s006.pdf [file pgen.1000678.s006.pdf]

| Barrett et al SNP      | WTCCC SNP  | r2   | Chr      | LD region     | Gene or Num of genes |
|------------------------|------------|------|----------|---------------|----------------------|
| rs2269241              | rs2269241  | 1    | 1p31.3   | 63.87–63.94   | <i>PGM1</i>          |
| rs2476601              | rs6679677  | 1    | 1p13.2   | 113.62–114.46 | <i>PTPN22</i>        |
| rs2816316              | rs1323296  | 1    | 1q31.2   | 190.73–190.82 | <i>RGS1</i>          |
| rs3024505              | rs3024505  | 1    | 1q32.1   | 204.87–205.12 | <i>IL10</i>          |
| rs1534422              | rs10175906 | 0.72 | 2p25.1   | 12.53–12.60   | (0)                  |
| rs917997               | rs2041756  | 1    | 2q12.1   | 102.22–102.58 | <i>IL18RAP</i>       |
| rs1990760              | rs7608315  | 0.59 | 2q24.2   | 162.67–163.10 | <i>IFIH1</i>         |
| rs3087243              | rs3087243  | 1    | 2q33.2   | 204.38–204.53 | <i>CTLA4</i>         |
| rs11711054             | rs6441961  | 1    | 3p21.31  | 45.96–46.63   | <i>CCR5</i>          |
| rs10517086             | rs17698094 | 0.54 | 4p15.2   | 25.64–25.75   | (0)                  |
| rs4505848              | rs17388568 | 0.83 | 4q27     | 123.13–123.83 | <i>IL2</i>           |
| rs6897932              | rs6897932  | 1    | 5p13.2   | 35.84–36.07   | <i>IL7R</i>          |
| rs9268645              | rs9268645  | 1    | 6p21.32  | 24.70–34.00   | <i>MHC</i>           |
| rs11755527             | rs11755527 | 1    | 6q15     | 90.86–91.10   | <i>BACH2</i>         |
| rs9388489              | rs9388489  | 1    | 6q22.32  | 126.48–127.46 | <i>C6orf173</i>      |
| rs2327832              | rs2327832  | 1    | 6q23.3   | 137.80–138.40 | <i>TNFAIP3</i>       |
| rs1738074              | rs2016588  | 0.57 | 6q25.3   | 159.13–159.62 | <i>TAGAP</i>         |
| rs7804356              | rs10486478 | 1    | 7p15.2   | 26.62–27.17   | (10)                 |
| rs4948088              | rs10486748 | 0.41 | 7p12.1   | 50.87–51.64   | <i>COBL</i>          |
| rs7020673              | rs7020673  | 1    | 9p24.2   | 4.22–4.31     | <i>GLIS3</i>         |
| rs12251307             | rs12251307 | 1    | 10p15.1  | 6.07–6.24     | <i>IL2RA</i>         |
| rs11258747             | rs11258747 | 1    | 10p15.1  | 6.48–6.59     | <i>PRKCQ</i>         |
| rs10509540             | rs11816865 | 0.66 | 10q23.31 | 90.00–90.27   | <i>C10orf59</i>      |
| rs7111341 <sup>1</sup> | rs6578252  | 0.07 | 11p15.5  | 2.02–2.26     | <i>INS</i>           |
| rs4763879              | rs4763879  | 1    | 12p13.31 | 9.51–9.87     | <i>CD69</i>          |
| rs2292239              | rs2292239  | 1    | 12q13.2  | 54.64–55.09   | <i>ERBB3</i>         |
| rs1678536              | rs1678542  | 0.62 | 12q13.3  | 55.27–56.82   | <i>Multiple</i>      |
| rs3184504              | rs1265566  | 0.25 | 12q24.12 | 109.77–111.72 | <i>SH2B3</i>         |
| rs1465788              | rs1465788  | 1    | 14q24.1  | 68.24–68.39   | (2)                  |
| rs4900384              | rs4900384  | 1    | 14q32.2  | 97.43–97.60   | (0)                  |
| rs3825932              | rs3825932  | 1    | 15q25.1  | 76.77–77.05   | <i>CTSH</i>          |
| rs12708716             | rs12708716 | 1    | 16p13.13 | 10.92–11.56   | <i>CLEC16A</i>       |
| rs12444268             | rs12444268 | 1    | 16p12.3  | 20.17–20.28   | (2)                  |
| rs4788084              | rs151181   | 0.9  | 16p11.2  | 28.19–28.94   | <i>IL27</i>          |
| rs7202877              | rs4536500  | 0.64 | 16q23.1  | 73.76–74.09   | (7)                  |
| rs16956936             | rs16956936 | 1    | 17p13.1  | 7.56–7.66     | (2)                  |
| rs2290400              | rs1008723  | 1    | 17q12    | 34.63–35.51   | <i>ORMDL3</i>        |
| rs7221109              | rs7221109  | 1    | 17q21.2  | 35.95–36.13   | (3)                  |
| rs1893217              | rs16939895 | 0.69 | 18p11.21 | 12.73–12.92   | <i>PTPN2</i>         |
| rs763361               | rs1788101  | 0.18 | 18q22.2  | 65.63–65.72   | <i>CD226</i>         |

|                        |            |      |          |               |                |
|------------------------|------------|------|----------|---------------|----------------|
| rs425105               | rs4804000  | 0.69 | 19q13.32 | 51.84–52.02   | (5)            |
| rs2281808              | rs2281808  | 1    | 20p13    | 1.44–1.71     | (3)            |
| rs11203203             | rs11203203 | 1    | 21q22.3  | 42.68–42.76   | <i>UBASH3A</i> |
| rs229541               | rs229541   | 1    | 22q13.1  | 35.90–36.00   | <i>C1QTNF6</i> |
| rs5753037              | rs41176    | 1    | 22q12.2  | 28.14–29.00   | (14)           |
| rs2664170 <sup>2</sup> |            |      | Xq28     | 153.48–154.10 | (16)           |

1: The *INS* locus is not well covered by the Affymetrix array.

2: The chromosome X marker is not used in our study.
