# Supplementary material for: From Disease Association to Risk Assessment: An Optimistic View from Genome-Wide Association Studies on Type 1 Diabetes
Source: PLoS Genet. 2009 Oct 9;5(10):e1000678. doi: 10.1371/journal.pgen.1000678 (PMC2748686; doi:10.1371/journal.pgen.1000678)
Supplement: Table S4 — Prediction performance of the CHOP/Montreal-T1D trained model on the GoKind-T1D datasets. (0.02 MB PDF) [file pgen.1000678.s005.pdf]

| Algorithm | P Cutoff    | $1 \times 10^{-8}$ | $1 \times 10^{-7}$ | $1 \times 10^{-6}$ | $1 \times 10^{-5}$ | $1 \times 10^{-4}$ | $1 \times 10^{-3}$ |
|-----------|-------------|--------------------|--------------------|--------------------|--------------------|--------------------|--------------------|
|           | #SNPs       | 166                | 201                | 237                | 295                | 392                | 998                |
| SVM       | AUC         | 0.826              | 0.837              | 0.838              | 0.819              | 0.801              | 0.713              |
|           | Sensitivity | 0.83               | 0.825              | 0.815              | 0.78               | 0.758              | 0.611              |
|           | specificity | 0.688              | 0.697              | 0.709              | 0.711              | 0.711              | 0.687              |
| LR        | AUC         | 0.83               | 0.816              | 0.802              | 0.747              | 0.737              | 0.66               |
|           | Sensitivity | 0.788              | 0.806              | 0.754              | 0.695              | 0.689              | 0.532              |
|           | specificity | 0.709              | 0.682              | 0.689              | 0.671              | 0.66               | 0.666              |
